# Supplementary material
Source: Springer Nature journal article supplement (https://www.springermedizin.de/resource/supplementary/12889_2014_6810_MOESM1_ESM.pdf/9499082)

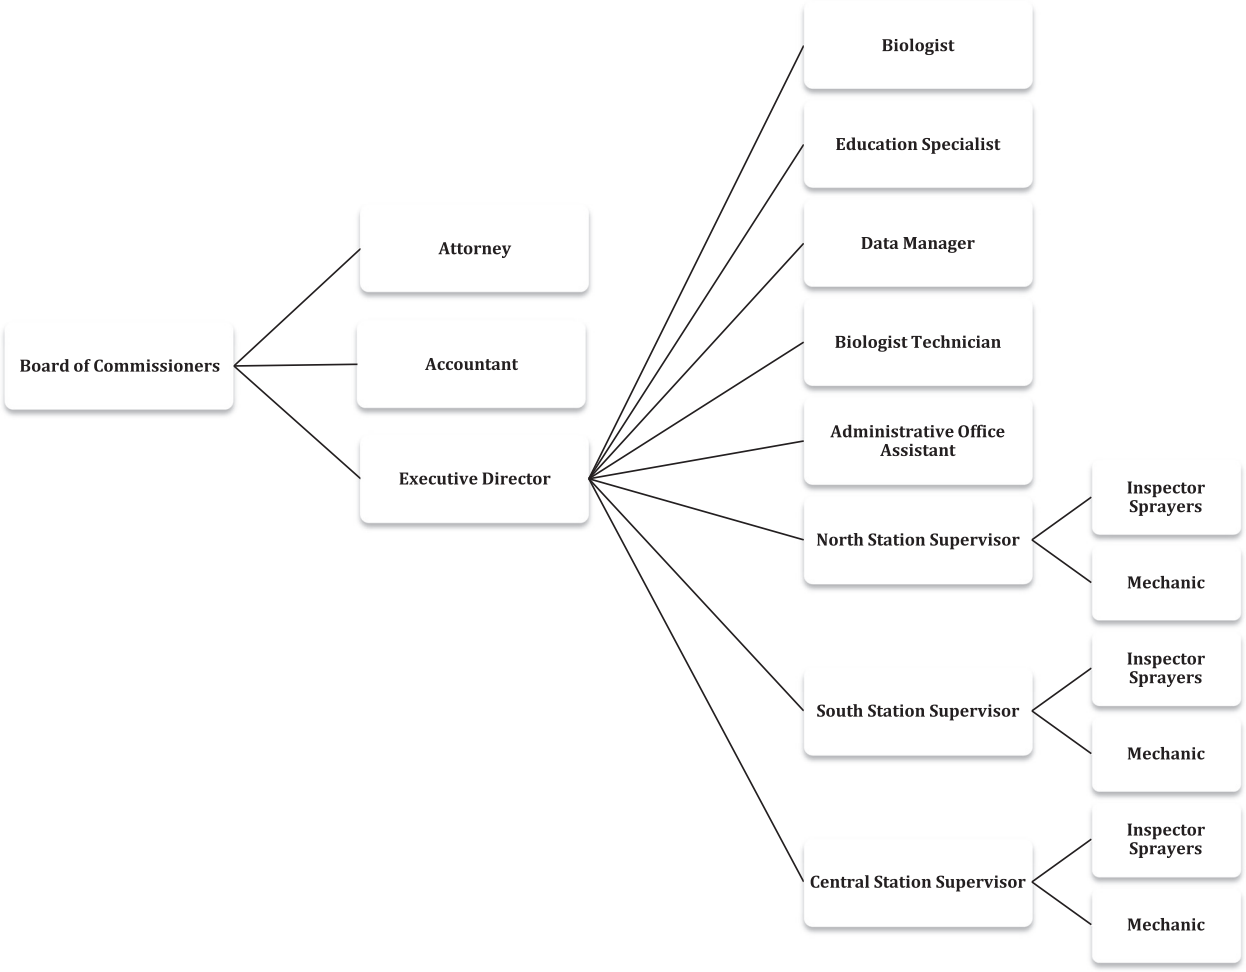

Supplement: MOESM1 [file 9499082]
